# Supplementary material for: Assessment of postoperative health functioning after knee arthroplasty in relation to pain catastrophizing: a 6-month follow-up cohort study
Source: PeerJ journal article supplement (doi:10.7717/peerj.9903), 2020-09-09
Supplement: Supplementary_Information.pdf [file Supplementary_Information.pdf]

# **Assessment of postoperative health functioning after knee arthroplasty in relation to pain catastrophizing: A 6-month follow-up cohort study**

Marc Terradas-Monllor, Mirari Ochandorena-Acha, Julio Salinas-Chesa, Sergi Ramirez-Ramos, Hector Beltran-Alacreu

## **Supplementary Figures**

- Figure S1 WOMAC Total Score differences between groups during rehabilitation process.
- Figure S2 WOMAC Pain differences between groups during rehabilitation process.
- Figure S3 WOMAC Stiffness differences between groups during rehabilitation process.
- Figure S4 WOMAC disability differences between groups during rehabilitation process.
- Figure S5 EQ-5D-5L differences between groups during rehabilitation process.
- Figure S6 4 Meters Walking Test differences between groups during rehabilitation process.
- Figure S7 30-second Chair Stand Test differences between groups during rehabilitation process.
- Figure S8 Active Knee Flexion differences between groups during rehabilitation process.
- Figure S9 Active Knee Extension differences between groups during rehabilitation process.
- Figure S10 VAS Rest differences between groups during rehabilitation process.
- Figure S11 VAS Walking differences between groups during rehabilitation process.
- Figure S12 VAS Flexion differences between groups during rehabilitation process.

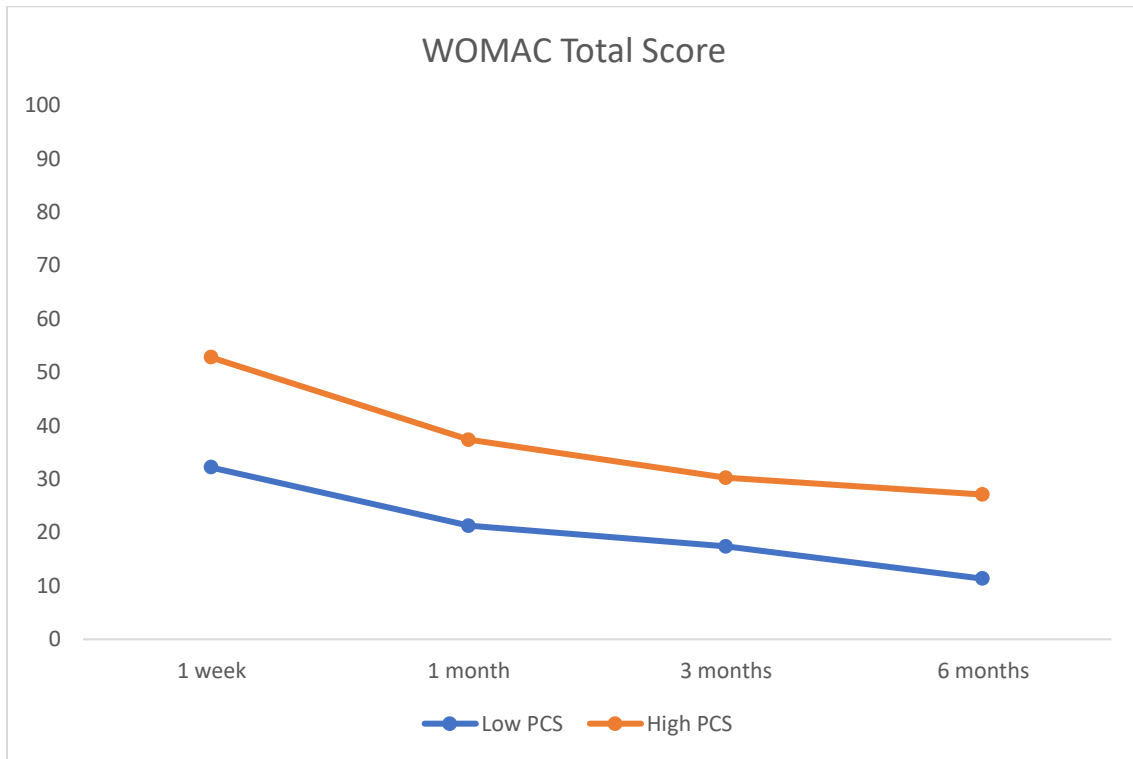

**Figure S1.** WOMAC Total Score differences between groups during rehabilitation process.  
WOMAC = Western Ontario and McMaster Osteoarthritis Index.

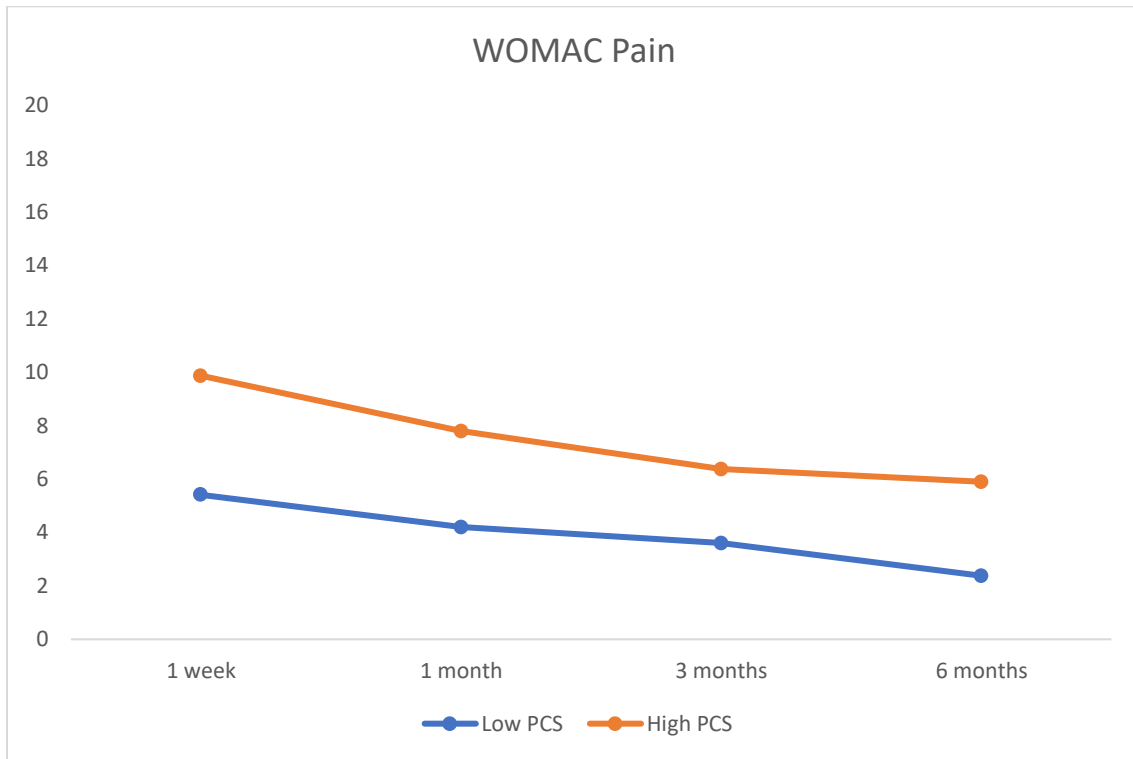

**Figure S2.** WOMAC Pain differences between groups during rehabilitation process.

WOMAC = Western Ontario and McMaster Osteoarthritis Index.

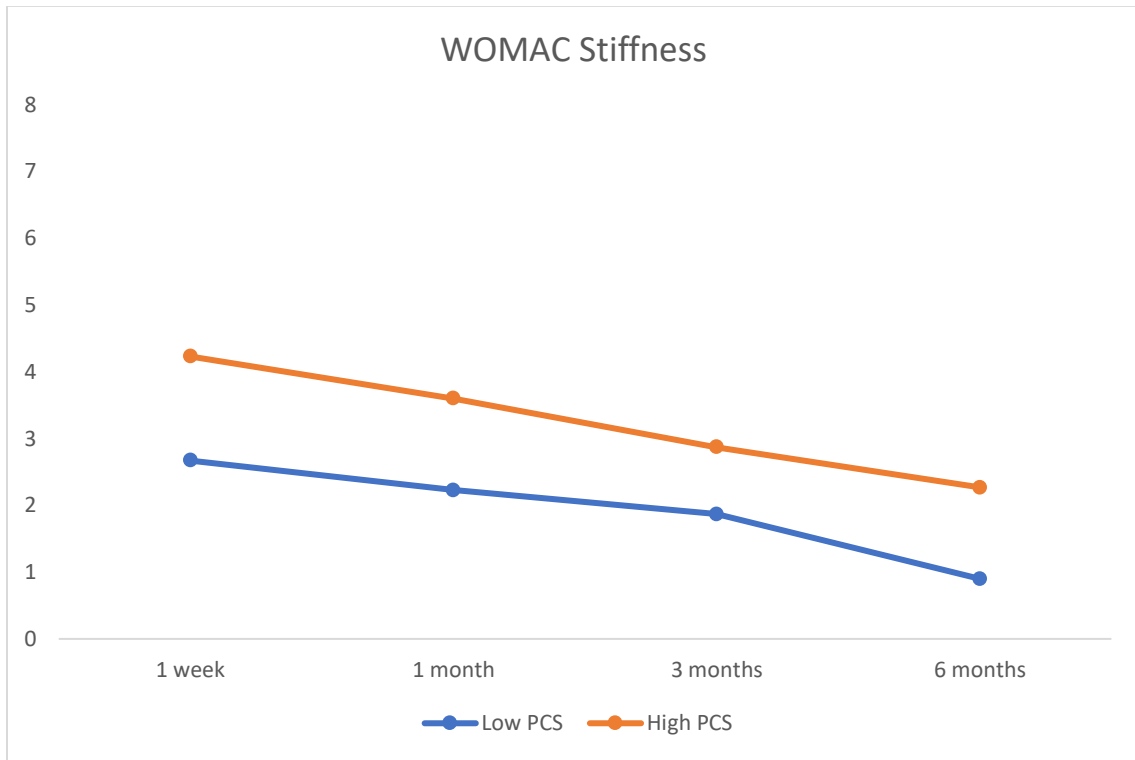

**Figure S3.** WOMAC Stiffness differences between groups during rehabilitation process.

WOMAC = Western Ontario and McMaster Osteoarthritis Index.

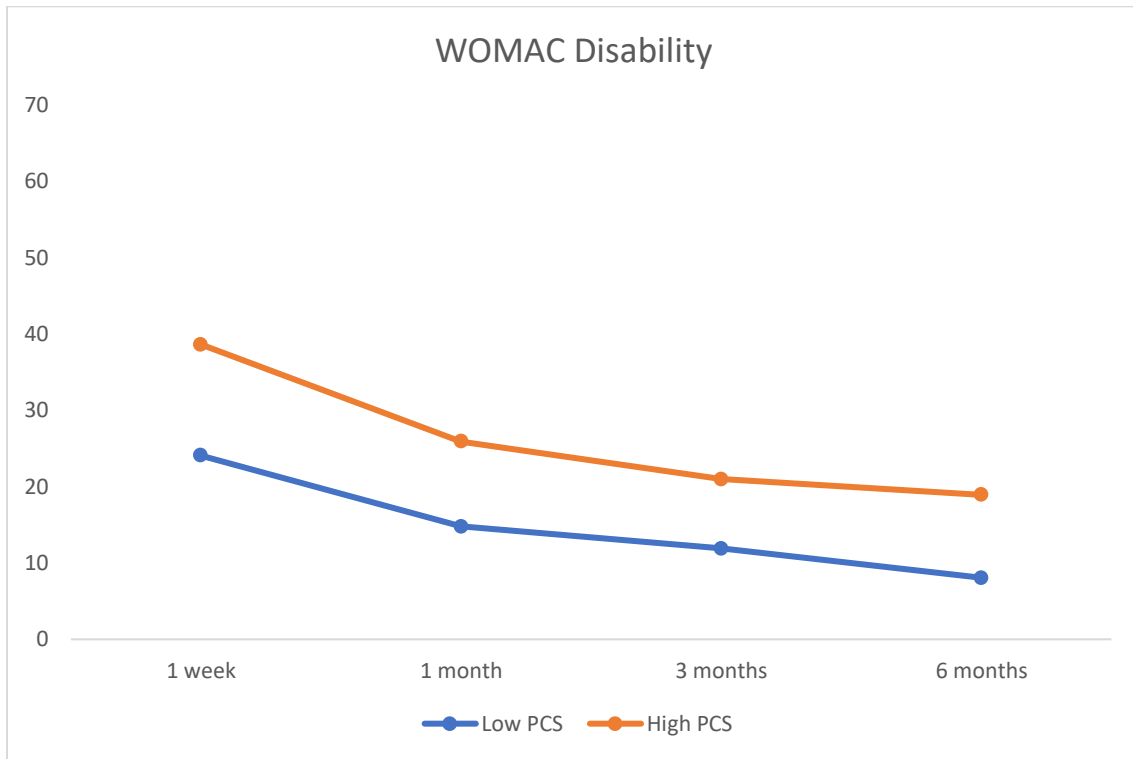

**Figure S4.** WOMAC Disability differences between groups during rehabilitation process.  
WOMAC = Western Ontario and McMaster Osteoarthritis Index.

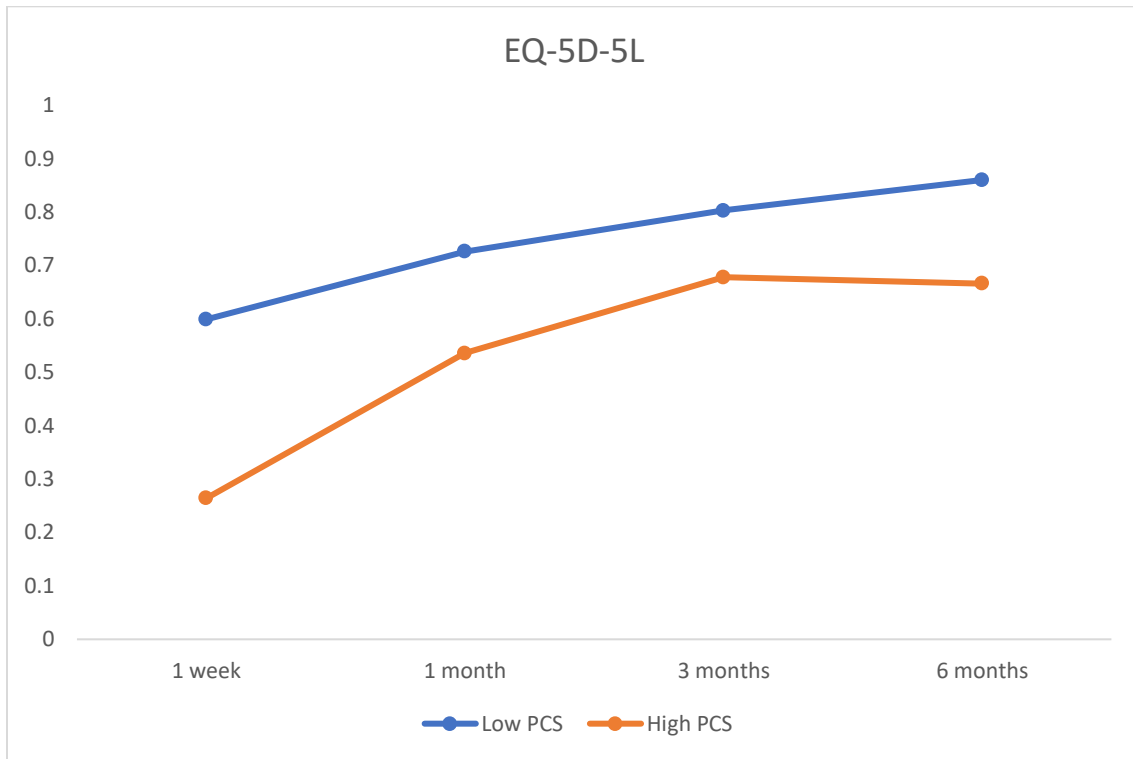

**Figure S5.** EQ-5D-5L differences between groups during rehabilitation process.

EQ-5D-5L = Euro Quality of Life 5 Dimensions – 5 Levels.

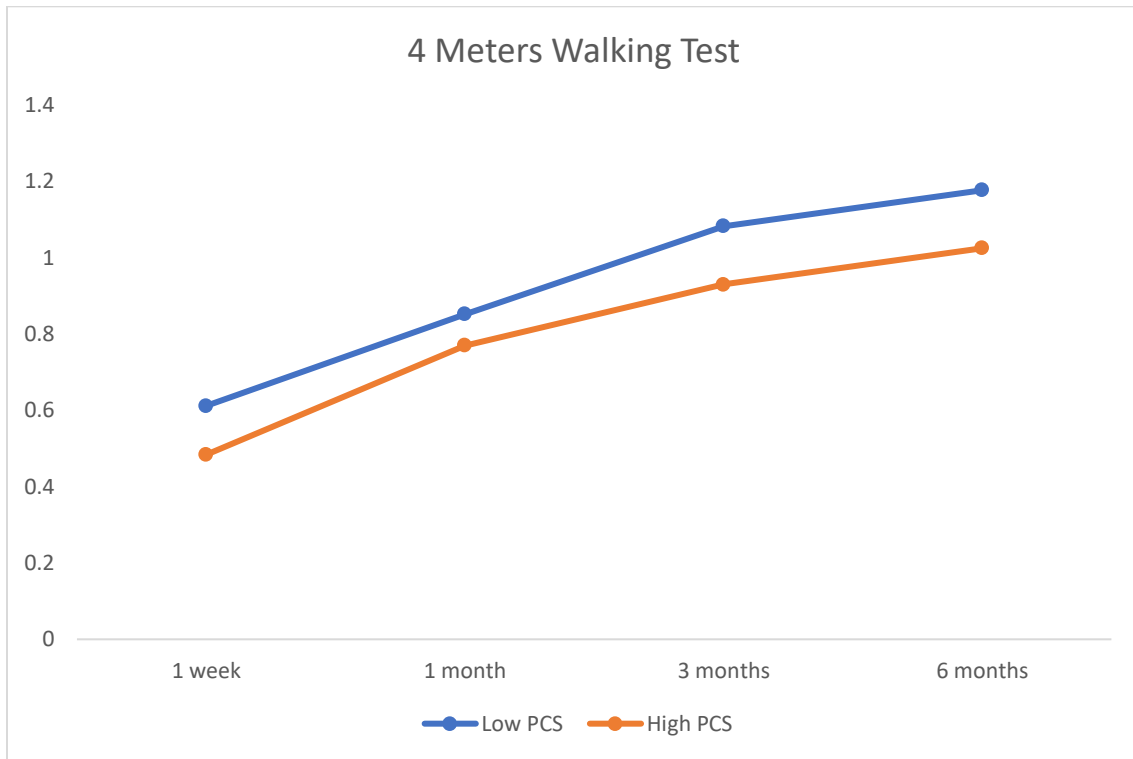

**Figure S6.** 4 Meters Walking Test differences between groups during rehabilitation process.

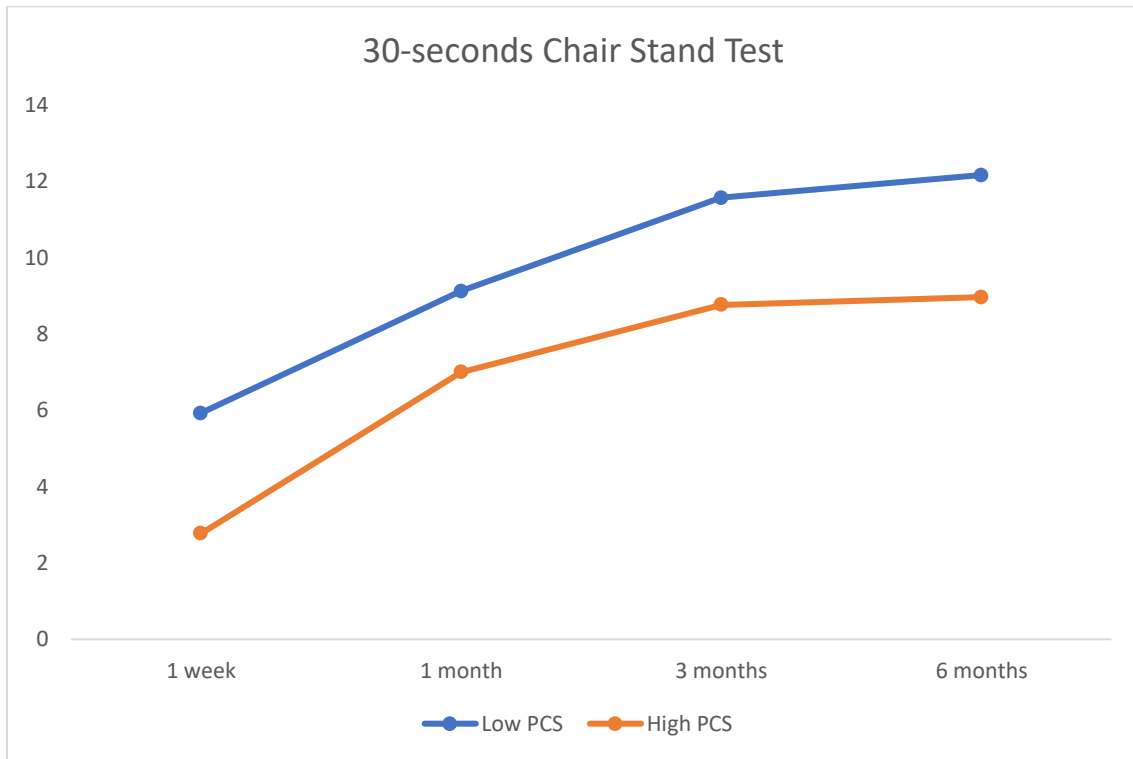

**Figure S7.** 30-second Chair Stand Test differences between groups during rehabilitation process.



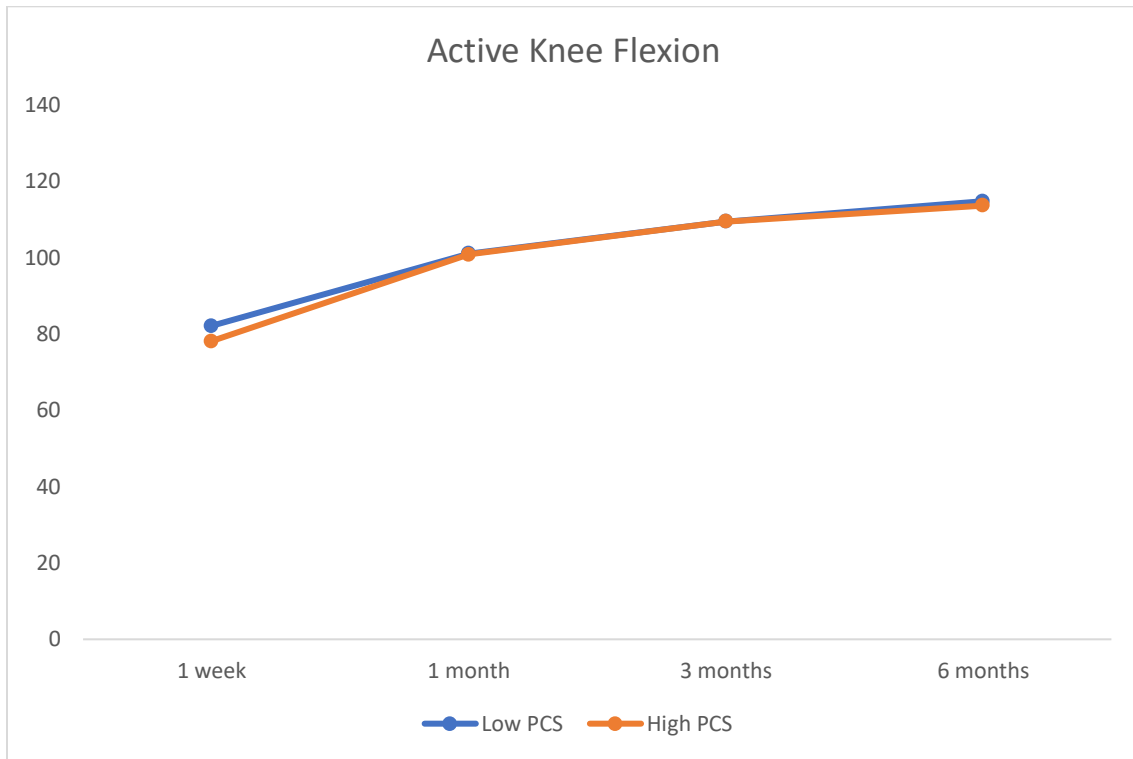

**Figure S8.** Active Knee Flexion differences between groups during rehabilitation process.

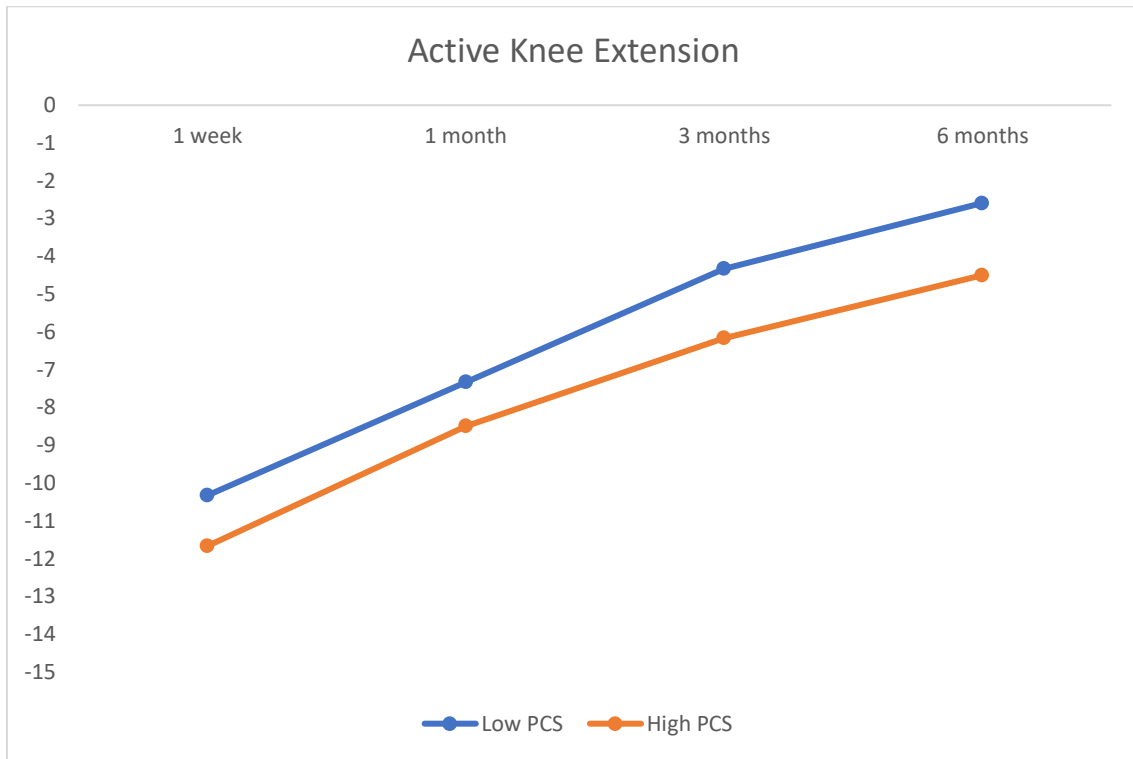

**Figure S9.** Active Knee Extension differences between groups during rehabilitation process.

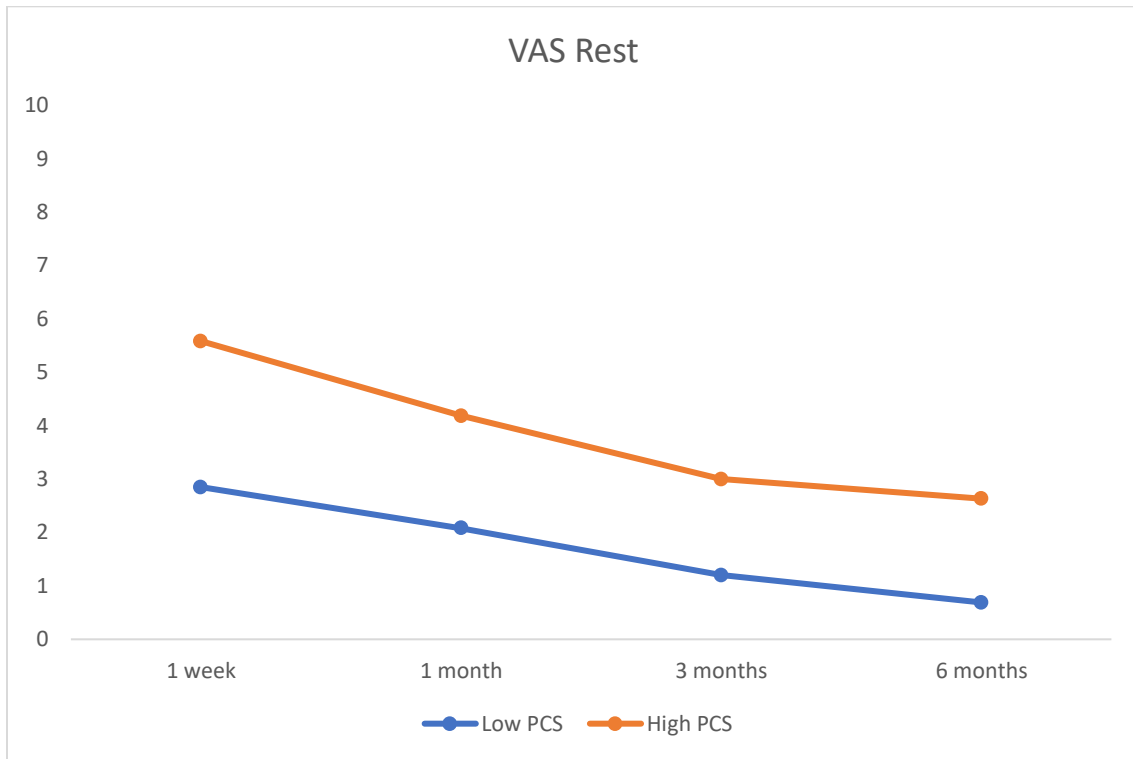

**Figure S10.** VAS Rest differences between groups during rehabilitation process.

VAS = Visual Analog Scale

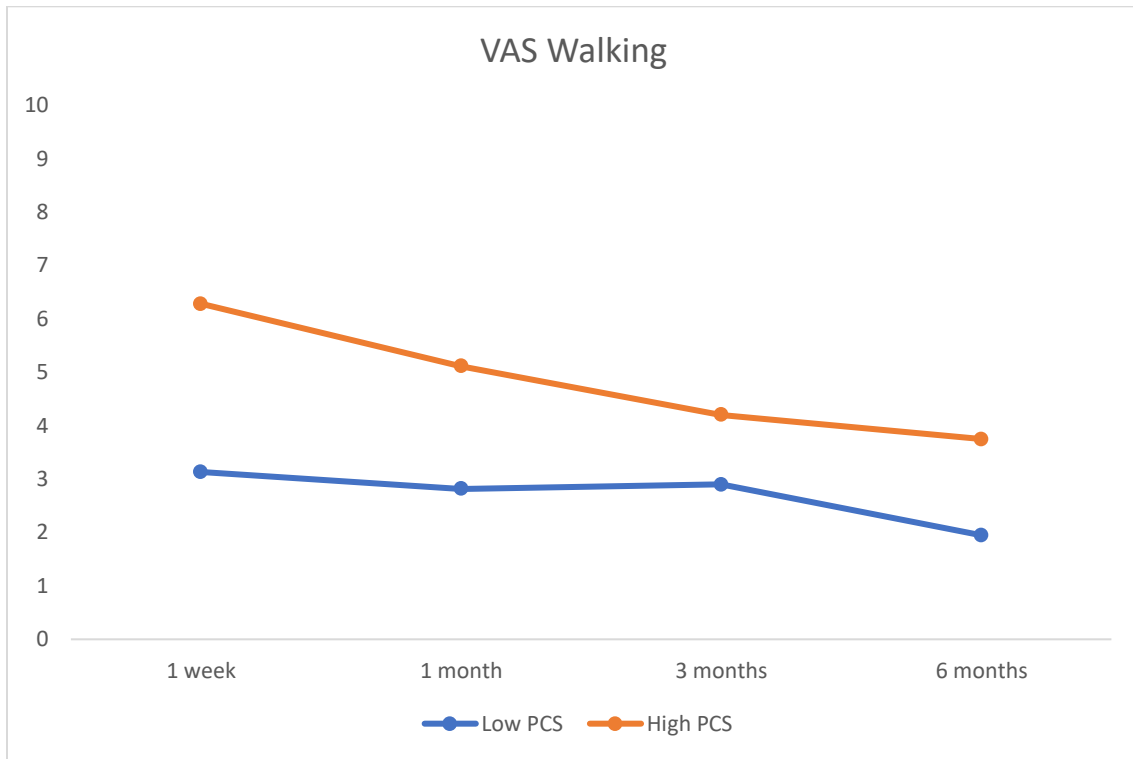

**Figure S11.** VAS Walking differences between groups during rehabilitation process.

VAS = Visual Analog Scale

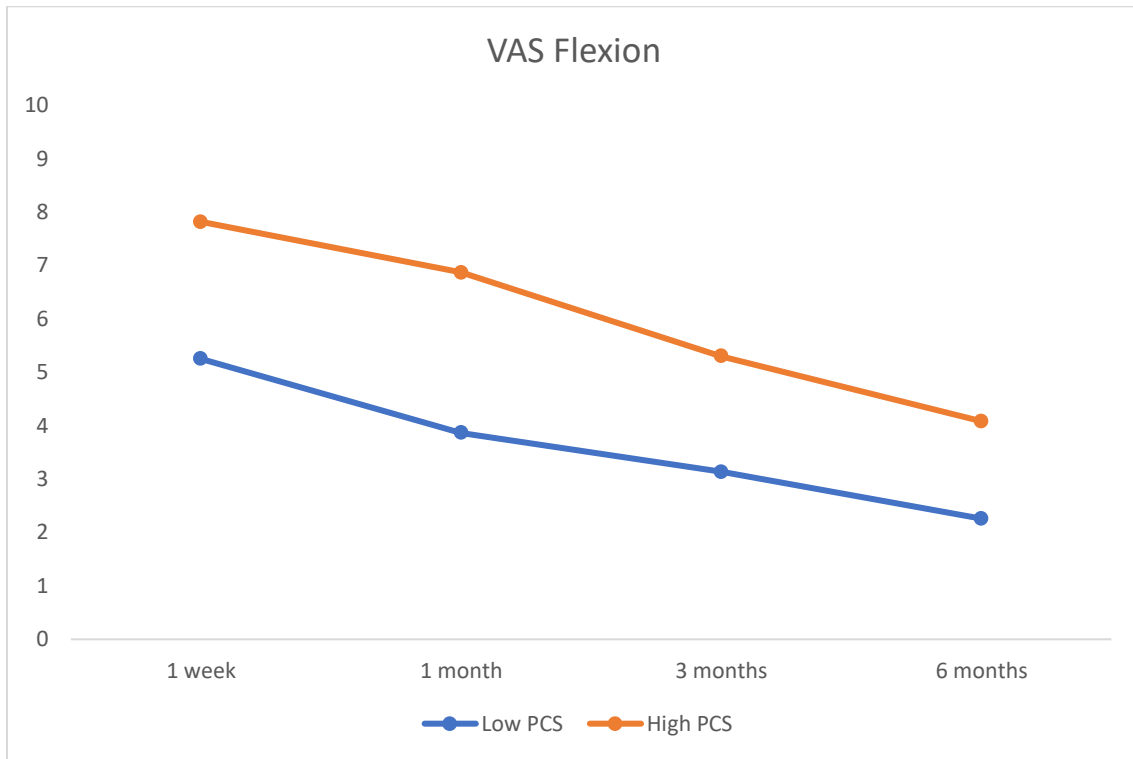

**Figure S12.** VAS Flexion differences between groups during rehabilitation process.

VAS = Visual Analog Scale
